# Supplementary material
Source: PubMed Central journal article supplement (PMC3391095)
Supplement: supp_M112.357582_jbc.M112.357582-1.pdf [file supp_M112.357582_jbc.M112.357582-1.pdf]

Supplementary File 1:

Supplementary Table S1: Mass Spectrometry Analysis of TDP-43-containing Protein Complex

| <b>Band</b> | <b>Identified proteins</b> | <b>Peptides</b>                                                                                                                                                                             |
|-------------|----------------------------|---------------------------------------------------------------------------------------------------------------------------------------------------------------------------------------------|
| 211 kDa     | PLEXIN A2                  | SGIPYLDYR<br>DSPSNKLLYAK<br>LLYAKDIPSYK<br>LTGNLTIQVAHK                                                                                                                                     |
| 102 kDa     | KIF18A                     | HILVFDPK                                                                                                                                                                                    |
| 77 kDa      | FMRP2                      | LQIDEQLR<br>GSNGAFYK<br>NEEATKHLETSK                                                                                                                                                        |
| 71 kDa      | hnRNP R                    | LKDYAFVHFEDR<br>VTEGLVDVILYHQDDK<br>YGGPPPDSVYSGVQPGIGTEVFGK<br>TKENILEEFSK<br>STAYEDYYYHPPPR<br>LFVGSIPK<br>LMMDPLSGQNR<br>AGPIWDLR<br>NLATTVTTEEILEK<br>SFSEFGK<br>ALLER<br>DLYEDELVPLFEK |
| 64 kDa      | hnRNP L                    | SKPGAAMVEMADGYAVDR<br>TPASPVVHIR<br>NDQDTWDYTNPNLSGQGDGPNPNKR<br>AITHLNNFMFGQK<br>NPNGPYPYTLK<br>SSSGLLEWESK<br>NPNGPYPYTLK                                                                 |
| 63 kDa      | hnRNP Q                    | TKEQILEEFSK<br>LKDYAFIHFDER<br>GVEAGPDLLQ                                                                                                                                                   |

|        |         |                            |
|--------|---------|----------------------------|
|        |         | VTEGLTDVILYHQPDDKKK        |
|        |         | EFNEDGALAVLQQFK            |
|        |         | DSDLSHVQNK                 |
|        |         | AGPIWDLR                   |
|        |         | LYNNHEIR                   |
|        |         | KYGGPPPDSVYSGQQPSVGTEIFVGK |
|        |         | YGGPPPDSVYSGQQPSVGTEIFVGK  |
|        |         | DLFEDELVPLFEK              |
| 61 kDa | FMRP1   | LQIDEQLR                   |
|        |         | GSNGAFYK                   |
|        |         | EDGMVPFVFGTK               |
| 55 kDa | STAU1   | TKPIVKPQTSPEYGQGINPISR     |
|        |         | ILQNEPLPER                 |
|        |         | ELLYGGTSPTAETILK           |
|        |         | ATVTAMIAR                  |
|        |         | VSVGFEVGELEGK              |
|        |         | NLPVNFVAR                  |
|        |         | KEKEPEYLLTER               |
|        |         | LLSELDQQSTEMPR             |
|        |         | KEKEPEYLLTER               |
|        |         | EKEPEYLLTER                |
|        |         | VQGFQVEYKDFPK              |
|        |         | EPEYLLTER                  |
|        |         | VQGFQVEYK                  |
|        |         | EFVMQVK                    |
| 48 kDa | hnRNP K | LLIHQSLAGGIIGVK            |
|        |         | RPAEDMEEEQAFKR             |
|        |         | SRNTDEMVELR                |
|        |         | VVLIGGKPR                  |
|        |         | DLAGSIIGK                  |
|        |         | IDEPLEGSEDR                |
|        |         | HESGASIKIDEPLEGSEDR        |
|        |         | NLPLPPPPPR                 |
|        |         | GGDLMAYDRR                 |
|        |         | NTDEMVELR                  |
|        |         | TDYNASVSPDSSGPER           |
|        |         | IILDLISESPIK               |

|        |             |                                                                                                                                      |
|--------|-------------|--------------------------------------------------------------------------------------------------------------------------------------|
| 37 kDa | hnRNP A2/B1 | KLFVGGIK<br>LFVGGIKEDTEEHHLR<br>GGGGNFGPGPGSNFR<br>GGNFGFGDSR<br>LFVGGIK<br>TLETVPLER                                                |
| 31kDa  | hnRNP A0    | LFIGGLNVQTSEGLR<br>GFGFVYFQNHDAADK<br>GDVAEGDLIEHFSQFGTVEK<br>LFVGGGLK<br>KLFVGGGLK                                                  |
| 30kDa  | hnRNP A1    | SSGPYGGGGQYFAKPR<br>IEVIEIMTDR<br>LFIGGLSFETTDESLR<br>KIFVGGIK<br>GFAFVTFDDHDSVDK<br>KFIGGLSFETTDESLR<br>IFVGGIKEDTEEHHLR<br>IFVGGIK |
| 15kDa  | FUS         | LKGEATVSFDDPPSAK<br>AAIDWFDGKEFSGNPIK<br>GEATVSFDDPPSAK<br>TGQPMINLYTDR<br>VSFATR                                                    |

---

Supplementary Table S2 : mRNA Microarray Results of TDP-43 (cut-off = 2 fold)

| ProbeSetID  | siTDP-43 | siCtrl  | Ratio  | Representative Public ID | UniGene ID | Gene Symbol |
|-------------|----------|---------|--------|--------------------------|------------|-------------|
| 201289_at   | 2923.16  | 1080.48 | 2.7054 | NM_001554                | Hs.8867    | CYR61       |
| 201852_x_at | 527.59   | 191.03  | 2.7618 | AI813758                 | Hs.443625  | COL3A1      |
| 202822_at   | 910.43   | 394.61  | 2.3072 | BF221852                 | Hs.444362  | LPP         |
| 203231_s_at | 266.18   | 130.16  | 2.045  | AW235612                 | Hs.434961  | ATXN1       |
| 203232_s_at | 550.13   | 241.65  | 2.2766 | NM_000332                | Hs.434961  | ATXN1       |
| 203603_s_at | 120.89   | 60.21   | 2.0078 | NM_014795                | Hs.34871   | ZEB2        |
| 203789_s_at | 720.59   | 334.69  | 2.153  | NM_006379                | Hs.269109  | SEMA3C      |
| 204222_s_at | 244.62   | 104.94  | 2.331  | NM_006851                | Hs.205558  | GLIPR1      |
| 204604_at   | 526.68   | 245.9   | 2.1418 | NM_012395                | Hs.430742  | PFTK1       |
| 204722_at   | 202.35   | 99.59   | 2.0318 | AW007335                 | Hs.4865    | SCN3B       |
| 205547_s_at | 192.79   | 70.65   | 2.7288 | NM_003186                | Hs.410977  | TAGLN       |
| 205807_s_at | 1099.37  | 510.1   | 2.1552 | NM_020127                | Hs.489922  | TUFT1       |
| 206318_at   | 49.33    | 20.64   | 2.39   | NM_020398                | Hs.121084  | SPINLW1     |
| 206323_x_at | 4857.04  | 2381.22 | 2.0397 | NM_002547                | Hs.128824  | OPHN1       |
| 206515_at   | 23.1     | 4.86    | 4.7531 | NM_000896                | Hs.106242  | CYP4F3      |
| 206977_at   | 59.25    | 29.14   | 2.0333 | NM_000315                | Hs.37045   | PTH         |
| 207181_s_at | 1439.94  | 507.32  | 2.8383 | NM_001227                | Hs.9216    | CASP7       |
| 209344_at   | 1119.97  | 282.9   | 3.9589 | BC002827                 | Hs.631618  | TPM4        |
| 209469_at   | 252.06   | 122.71  | 2.0541 | BF939489                 | Hs.75819   | GPM6A       |
| 209470_s_at | 157.58   | 69.45   | 2.269  | D49958                   | Hs.75819   | GPM6A       |
| 209676_at   | 45.59    | 17.57   | 2.5948 | J03225                   | Hs.516578  | TFPI        |
| 209755_at   | 156.63   | 62.28   | 2.5149 | AF288395                 | Hs.497123  | NMNAT2      |
| 209818_s_at | 788.09   | 361.69  | 2.1789 | AF241831                 | Hs.494567  | HABP4       |
| 209883_at   | 174.02   | 85.94   | 2.0249 | AF288389                 | Hs.387995  | GLT25D2     |
| 210764_s_at | 1823.78  | 645.44  | 2.8256 | AF003114                 | Hs.8867    | CYR61       |
| 211161_s_at | 505.6    | 247.8   | 2.0404 | AF130082                 | Hs.443625  | COL3A1      |
| 211347_at   | 199.47   | 75.36   | 2.6469 | AF064105                 | Hs.40582   | CDC14B      |
| 211502_s_at | 103.76   | 50.58   | 2.0514 | AF119833                 | Hs.430742  | PFTK1       |
| 211959_at   | 707.7    | 321.13  | 2.2038 | AW007532                 | Hs.607212  | IGFBP5      |
| 212353_at   | 58.46    | 25.37   | 2.3043 | AI479175                 | Hs.409602  | SULF1       |
| 212481_s_at | 2068.52  | 775.8   | 2.6663 | AI214061                 | Hs.631618  | TPM4        |
| 212956_at   | 913.4    | 433.25  | 2.1083 | AI348094                 | Hs.480819  | TBC1D9      |
| 213258_at   | 417.98   | 166.48  | 2.5107 | BF511231                 | Hs.516578  | TFPI        |
| 214743_at   | 1233.84  | 606.48  | 2.0344 | BE046521                 | Hs.654389  | CUX1        |
| 215076_s_at | 910.64   | 316.52  | 2.877  | AU144167                 | Hs.443625  | COL3A1      |

|             |         |         |        |           |           |             |
|-------------|---------|---------|--------|-----------|-----------|-------------|
| 216153_x_at | 3151.13 | 1426.3  | 2.2093 | AK022897  | Hs.388918 | RECK        |
| 217481_x_at | 6.77    | 1       | 6.77   | AL110201  | Hs.672782 | ---         |
| 220195_at   | 362.79  | 167.9   | 2.1608 | NM_018328 | Hs.458312 | MBD5        |
| 220232_at   | 1112.17 | 227.49  | 4.8889 | NM_024906 | Hs.379191 | SCD5        |
| 220874_at   | 51.98   | 21.57   | 2.4098 | NM_018575 | ---       | ---         |
| 221211_s_at | 20.7    | 6.85    | 3.0219 | NM_020152 | Hs.222802 | C21orf7     |
| 224159_x_at | 3926.53 | 1952.09 | 2.0114 | AF220023  | Hs.50749  | TRIM4       |
| 224675_at   | 3197.7  | 1489.43 | 2.1469 | AK026606  | Hs.578450 | MESDC2      |
| 224679_at   | 943.59  | 467.49  | 2.0184 | BE963495  | Hs.578450 | MESDC2      |
| 224811_at   | 873.84  | 384.51  | 2.2726 | BF112093  | Hs.592801 | ---         |
| 225066_at   | 230.51  | 114.32  | 2.0164 | AI459157  | ---       | ---         |
| 225935_at   | 974.12  | 429.8   | 2.2664 | AI350995  | Hs.191482 | ---         |
| 225937_at   | 453.32  | 203.32  | 2.2296 | BF002121  | Hs.191482 | ---         |
| 226612_at   | 730.24  | 319.22  | 2.2876 | H17038    | Hs.126856 | FLJ25076    |
| 226751_at   | 564.07  | 224.64  | 2.511  | AW193693  | Hs.212885 | CNRIP1      |
| 227069_at   | 385.36  | 187.77  | 2.0523 | AA806989  | Hs.191482 | ---         |
| 228006_at   | 539.75  | 247.81  | 2.1781 | BG403361  | Hs.644684 | ---         |
| 228369_at   | 1091.05 | 412.78  | 2.6432 | AI262560  | Hs.414099 | CNPY3       |
| 228635_at   | 228.38  | 96.66   | 2.3627 | AI640307  | Hs.192859 | PCDH10      |
| 228640_at   | 507.26  | 152.17  | 3.3335 | BE644809  | Hs.479439 | PCDH7       |
| 228731_at   | 79.86   | 36.69   | 2.1766 | AW236803  | Hs.24321  | ---         |
| 228854_at   | 141.69  | 51.38   | 2.7577 | AI492388  | Hs.586747 | ---         |
| 229435_at   | 87.56   | 41.8    | 2.0947 | AW025602  | Hs.162125 | GLIS3       |
| 229912_at   | 304.8   | 148.17  | 2.0571 | AL042166  | Hs.653013 | SDK1        |
| 230225_x_at | 7.59    | 1       | 7.59   | AI255029  | Hs.666896 | ---         |
| 230444_at   | 204.09  | 93.22   | 2.1893 | AI697756  | Hs.661515 | ---         |
| 231798_at   | 250.4   | 115.04  | 2.1766 | AL575177  | Hs.248201 | NOG         |
| 232298_at   | 137.54  | 66.27   | 2.0754 | AK026494  | ---       | hCG_1806964 |
| 233087_at   | 33.94   | 14.54   | 2.3343 | AL133602  | Hs.657225 | FBXL17      |
| 233919_s_at | 260.18  | 92.22   | 2.8213 | BF213501  | Hs.494567 | HABP4       |
| 234675_x_at | 3795.92 | 1011.86 | 3.7514 | AK027219  | Hs.532596 | ---         |
| 234805_at   | 76.92   | 29.64   | 2.5951 | AF040257  | Hs.666808 | ---         |
| 235016_at   | 192.63  | 91.48   | 2.1057 | AL118571  | Hs.499833 | REEP3       |
| 236335_at   | 75.92   | 29.18   | 2.6018 | AW298375  | Hs.24321  | ---         |
| 237939_at   | 74.14   | 33.81   | 2.1928 | BE218107  | Hs.654492 | EPHA5       |
| 238447_at   | 179.08  | 83.43   | 2.1465 | AA428240  | Hs.696468 | RBMS3       |
| 238701_x_at | 4016.1  | 1964.31 | 2.0445 | BE176566  | Hs.125166 | C11orf92    |
| 240432_x_at | 112.37  | 55.97   | 2.0077 | AI333006  | Hs.603896 | ---         |
| 241789_at   | 67.92   | 26.89   | 2.5258 | AW338699  | Hs.594906 | ---         |
| 241879_at   | 467.67  | 192.77  | 2.4261 | AW511222  | Hs.557980 | ---         |

|              |         |         |         |           |           |           |
|--------------|---------|---------|---------|-----------|-----------|-----------|
| 242329_at    | 674.66  | 305.52  | 2.2082  | AW071804  | ---       | LOC401317 |
| 242342_at    | 110.52  | 53.9    | 2.0505  | BE645219  | Hs.572062 | ---       |
| 242715_at    | 194.27  | 62.13   | 3.1268  | AA331548  | Hs.444181 | ---       |
| 242923_at    | 712.12  | 345.45  | 2.0614  | AW027457  | Hs.30323  | ZNF678    |
| 243805_at    | 372.96  | 141.3   | 2.6395  | BG035826  | Hs.34333  | CCBE1     |
| 244441_at    | 157.4   | 49.63   | 3.1715  | AI128170  | Hs.667217 | ---       |
| 244829_at    | 126.17  | 55.67   | 2.2664  | N44676    | Hs.173337 | C6orf218  |
| 1552870_s_at | 19.2    | 7.35    | 2.6122  | NM_144696 | Hs.658505 | C1orf125  |
| 1554816_at   | 29.76   | 11.03   | 2.6981  | BC010680  | Hs.601562 | ASTN2     |
| 1555777_at   | 20.35   | 8.85    | 2.2994  | AY140646  | Hs.136348 | POSTN     |
| 1557754_at   | 243.28  | 115.83  | 2.1003  | BC028186  | Hs.385650 | LOC401068 |
| 1558048_x_at | 4745.63 | 101.4   | 46.8011 | BG389789  | ---       | ---       |
| 1561213_at   | 42.8    | 14.74   | 2.9037  | BC041341  | Hs.436589 | ---       |
| 1561676_at   | 44.85   | 14.1    | 3.1809  | AK056491  | Hs.670840 | ---       |
| 1567107_s_at | 646.21  | 221.76  | 2.914   | AF362887  | Hs.631618 | TPM4      |
| 1562527_at   | 27.1    | 7.99    | 3.3917  | AF519622  | Hs.710809 | LOC283027 |
| 1562755_at   | 44.15   | 21.32   | 2.0708  | BC043419  | Hs.566208 | ---       |
| 1565838_at   | 32.37   | 13.37   | 2.4211  | AI806319  | Hs.667028 | ---       |
| 1568866_at   | 11.69   | 4.8     | 2.4354  | R83290    | Hs.684454 | ---       |
| 200020_at    | 1308.02 | 4243.46 | 0.3082  | NM_007375 | Hs.300624 | TARDBP    |
| 200632_s_at  | 1446.41 | 3555.91 | 0.4068  | NM_006096 | Hs.372914 | NDRG1     |
| 200891_s_at  | 1660.97 | 3413.29 | 0.4866  | NM_003144 | Hs.114033 | SSR1      |
| 201037_at    | 1734.03 | 3517.7  | 0.4929  | NM_002627 | Hs.26010  | PFKP      |
| 201422_at    | 763.11  | 1595.06 | 0.4784  | NM_006332 | Hs.14623  | IFI30     |
| 201468_s_at  | 168.8   | 347.78  | 0.4854  | NM_000903 | Hs.406515 | NQO1      |
| 202856_s_at  | 179.86  | 387.09  | 0.4646  | NM_004207 | Hs.500761 | SLC16A3   |
| 202857_at    | 1302.67 | 3628.35 | 0.359   | NM_014255 | Hs.8752   | CNPY2     |
| 203021_at    | 460.93  | 1159.55 | 0.3975  | NM_003064 | Hs.517070 | SLPI      |
| 203427_at    | 444.58  | 917.69  | 0.4845  | NM_014034 | Hs.292316 | ASF1A     |
| 203465_at    | 789.46  | 1647.08 | 0.4793  | NM_014763 | Hs.44024  | MRPL19    |
| 203665_at    | 147.81  | 323.45  | 0.457   | NM_002133 | Hs.517581 | HMOX1     |
| 203851_at    | 135.74  | 326.51  | 0.4157  | NM_002178 | Hs.274313 | IGFBP6    |
| 204351_at    | 140.61  | 306.92  | 0.4581  | NM_005980 | Hs.2962   | S100P     |
| 204501_at    | 728.23  | 1582.26 | 0.4602  | NM_002514 | Hs.235935 | NOV       |
| 205625_s_at  | 63.34   | 250.57  | 0.2528  | AW014927  | Hs.65425  | CALB1     |
| 205626_s_at  | 47.45   | 171.09  | 0.2773  | NM_004929 | Hs.65425  | CALB1     |
| 205763_s_at  | 316.94  | 641.81  | 0.4938  | NM_006773 | Hs.363492 | DDX18     |
| 205899_at    | 239.63  | 792.99  | 0.3022  | NM_003914 | Hs.417050 | CCNA1     |
| 206091_at    | 64.83   | 180.36  | 0.3594  | NM_002381 | Hs.656199 | MATN3     |
| 206836_at    | 561.38  | 1256.3  | 0.4469  | NM_001044 | Hs.406    | SLC6A3    |

|             |         |         |        |           |           |          |
|-------------|---------|---------|--------|-----------|-----------|----------|
| 208896_at   | 773.14  | 1558.19 | 0.4962 | X98743    | Hs.363492 | DDX18    |
| 208958_at   | 31.64   | 67.56   | 0.4683 | AI827677  | Hs.154023 | ERP44    |
| 209125_at   | 12.78   | 95.44   | 0.1339 | J00269    | Hs.700779 | KRT6A    |
| 209426_s_at | 177.5   | 372.18  | 0.4769 | AF047020  | Hs.171929 | AMACR    |
| 209653_at   | 97.25   | 223.76  | 0.4346 | U93240    | Hs.715552 | KPNA4    |
| 209733_at   | 130.52  | 308.32  | 0.4233 | AL034399  | Hs.12256  | MID2     |
| 209921_at   | 136.85  | 285.52  | 0.4793 | AB040875  | Hs.390594 | SLC7A11  |
| 210102_at   | 47.74   | 114.52  | 0.4169 | BC001234  | Hs.152944 | VWA5A    |
| 210317_s_at | 292.07  | 700.17  | 0.4171 | U28936    | Hs.513851 | YWHAE    |
| 210431_at   | 517.23  | 1521.85 | 0.3399 | J04948    | Hs.333509 | ALPPL2   |
| 210432_s_at | 36.93   | 74.93   | 0.4929 | AF225986  | Hs.435274 | SCN3A    |
| 211143_x_at | 230.59  | 505.32  | 0.4563 | D49728    | Hs.524430 | NR4A1    |
| 211775_x_at | 7.59    | 16.39   | 0.4631 | BC006134  | Hs.303653 | MGC13053 |
| 211998_at   | 439.07  | 1047.65 | 0.4191 | AW138159  | Hs.180877 | H3F3B    |
| 212690_at   | 315.68  | 744.92  | 0.4238 | AB018268  | Hs.434966 | DDHD2    |
| 212991_at   | 105.06  | 228.4   | 0.46   | AL137520  | Hs.216653 | FBXO9    |
| 213119_at   | 470.19  | 965.78  | 0.4869 | AW058600  | Hs.269004 | SLC36A1  |
| 213123_at   | 463.53  | 1118.18 | 0.4145 | BE222709  | Hs.432818 | MFAP3    |
| 213326_at   | 371.92  | 953.54  | 0.39   | AU150319  | Hs.20021  | VAMP1    |
| 213567_at   | 162.2   | 336.49  | 0.482  | BF431965  | Hs.467866 | ---      |
| 214209_s_at | 86.18   | 176.33  | 0.4887 | BE504895  | Hs.511951 | ABCB9    |
| 215343_at   | 21.33   | 53.56   | 0.3982 | AF070587  | Hs.525536 | CCDC88C  |
| 215555_at   | 17.71   | 38.2    | 0.4636 | AU158442  | Hs.671113 | ---      |
| 215898_at   | 26.92   | 53.99   | 0.4986 | AK021879  | Hs.709609 | TTL5     |
| 216069_at   | 23.34   | 50.91   | 0.4585 | AL050065  | Hs.661229 | ---      |
| 216737_at   | 2.21    | 10.7    | 0.2065 | AK024525  | Hs.589082 | ---      |
| 217194_at   | 3.31    | 9.3     | 0.3559 | AB007970  | Hs.715627 | RASAL2   |
| 218163_at   | 1400.43 | 3688.72 | 0.3797 | NM_014060 | Hs.102696 | MCTS1    |
| 218196_at   | 248.62  | 542.04  | 0.4587 | NM_014028 | Hs.226780 | OSTM1    |
| 218536_at   | 368.36  | 1108.81 | 0.3322 | AF052167  | Hs.719256 | MRS2     |
| 218538_s_at | 335.45  | 818.04  | 0.4101 | NM_020662 | Hs.719256 | MRS2     |
| 219529_at   | 65.35   | 356     | 0.1836 | NM_004669 | Hs.64746  | CLIC3    |
| 219537_x_at | 253.49  | 514.94  | 0.4923 | NM_016941 | Hs.127792 | DLL3     |
| 220649_at   | 2.48    | 14.87   | 0.1668 | NM_024856 | Hs.648616 | AGBL3    |
| 221264_s_at | 408.66  | 1386.76 | 0.2947 | NM_031214 | Hs.300624 | TARDBP   |
| 221711_s_at | 597.2   | 1646.24 | 0.3628 | BC006244  | Hs.190722 | C19orf62 |
| 221772_s_at | 193.93  | 506.76  | 0.3827 | AI138993  | Hs.380372 | PPP2R2D  |
| 221935_s_at | 160.99  | 361.28  | 0.4456 | AK023140  | Hs.518059 | C3orf64  |
| 222062_at   | 96.74   | 238.06  | 0.4064 | AI983115  | Hs.132781 | IL27RA   |
| 222341_x_at | 21.61   | 45.31   | 0.4769 | AW973235  | Hs.663481 | ---      |

|             |         |         |        |           |           |           |
|-------------|---------|---------|--------|-----------|-----------|-----------|
| 222354_at   | 68.54   | 185.24  | 0.37   | AW675655  | Hs.517293 | F11R      |
| 39248_at    | 409.26  | 1161.01 | 0.3525 | N74607    | Hs.234642 | AQP3      |
| 222479_s_at | 752.29  | 1519.24 | 0.4952 | AK001081  | Hs.529495 | DYNC1LI1  |
| 222983_s_at | 1473.95 | 3410.48 | 0.4322 | BC001716  | ---       | PAIP2     |
| 223519_at   | 112.18  | 257.41  | 0.4358 | AW069181  | Hs.444451 | ZAK       |
| 223946_at   | 60.44   | 174.28  | 0.3468 | AL136776  | Hs.29679  | MED23     |
| 224022_x_at | 22.85   | 58.69   | 0.3893 | AF169963  | Hs.272375 | WNT16     |
| 224225_s_at | 126.59  | 289.54  | 0.4372 | AF218365  | Hs.272398 | ETV7      |
| 224734_at   | 657.15  | 1513.21 | 0.4343 | N92507    | Hs.593339 | HMGB1     |
| 225426_at   | 179.61  | 533.46  | 0.3367 | AW195360  | Hs.715605 | PPP6C     |
| 225429_at   | 551.99  | 1317    | 0.4191 | BF437011  | Hs.715605 | PPP6C     |
| 225435_at   | 346.77  | 1009.27 | 0.3436 | BF679286  | Hs.114033 | SSR1      |
| 225537_at   | 226.55  | 532.86  | 0.4252 | AA936745  | Hs.13303  | TRAPPC6B  |
| 225665_at   | 495.59  | 1120.16 | 0.4424 | AI129320  | Hs.444451 | ZAK       |
| 226431_at   | 216.45  | 452.65  | 0.4782 | AK025007  | Hs.471130 | FAM117B   |
| 218878_s_at | 680.95  | 1575.09 | 0.4449 | NM_012238 | Hs.369779 | SIRT1     |
| 226463_at   | 293.17  | 632.68  | 0.4634 | AW241758  | Hs.86905  | ATP6V1C1  |
| 226712_at   | 241.23  | 679.16  | 0.3552 | BF206389  | Hs.114033 | SSR1      |
| 226905_at   | 433.98  | 879.87  | 0.4932 | BG036514  | Hs.719324 | FAM101B   |
| 226934_at   | 382.81  | 765.71  | 0.4999 | AU149663  | Hs.369606 | CPSF6     |
| 227322_s_at | 989.23  | 2063.22 | 0.4795 | BE464077  | Hs.715543 | BCCIP     |
| 227432_s_at | 343.35  | 780.97  | 0.4396 | AI215106  | Hs.705877 | ---       |
| 227639_at   | 499.38  | 1010.89 | 0.494  | AI275605  | Hs.178305 | PIGK      |
| 227943_at   | 126.61  | 299.03  | 0.4234 | AI798680  | Hs.713638 | ---       |
| 227984_at   | 55.38   | 123.73  | 0.4476 | BE464483  | Hs.371980 | LOC650392 |
| 228255_at   | 155.39  | 516.33  | 0.301  | AU150140  | Hs.12319  | ALS2CR4   |
| 228548_at   | 140.49  | 375.51  | 0.3741 | AU126086  | Hs.586618 | ---       |
| 228655_at   | 141.56  | 437.83  | 0.3233 | BE466077  | Hs.112482 | ---       |
| 228715_at   | 96.55   | 218.93  | 0.441  | AV725825  | Hs.21417  | ZCCHC12   |
| 229007_at   | 100.32  | 261.18  | 0.3841 | N50864    | Hs.696627 | LOC283788 |
| 229011_at   | 29.52   | 64.98   | 0.4543 | AA150501  | Hs.594584 | ---       |
| 229111_at   | 86.52   | 471.57  | 0.1835 | AA033699  | Hs.632369 | ---       |
| 229187_at   | 79.92   | 179.5   | 0.4452 | AI026708  | Hs.702270 | LOC283788 |
| 230192_at   | 138.56  | 287.08  | 0.4827 | AI472310  | Hs.436922 | TRIM13    |
| 230836_at   | 19.08   | 50.86   | 0.3751 | AI422986  | Hs.308628 | ST8SIA4   |
| 231716_at   | 338.61  | 719.77  | 0.4704 | AF255304  | Hs.533499 | RC3H2     |
| 232049_at   | 34.2    | 94.72   | 0.3611 | AK026718  | Hs.125352 | ---       |
| 232291_at   | 224.23  | 466.01  | 0.4812 | AA256157  | Hs.24115  | MIRHG1    |
| 233045_at   | 76.42   | 162.35  | 0.4707 | AK023309  | Hs.214040 | LOC286126 |
| 233506_at   | 154.86  | 391.58  | 0.3955 | N95440    | Hs.102941 | ---       |



|             |        |        |        |          |           |           |
|-------------|--------|--------|--------|----------|-----------|-----------|
| 234552_at   | 104.84 | 270.72 | 0.3873 | AK000090 | Hs.527460 | ---       |
| 234758_at   | 16.11  | 38.8   | 0.4152 | AK026789 | Hs.677396 | ---       |
| 234759_at   | 74.49  | 185.38 | 0.4018 | AK026836 | ---       | ---       |
| 235197_s_at | 135.25 | 342.4  | 0.395  | AV713913 | Hs.719130 | OSTM1     |
| 235198_at   | 202.44 | 530.57 | 0.3816 | AV713913 | Hs.719130 | OSTM1     |
| 235324_at   | 179.08 | 477.61 | 0.375  | AI445255 | Hs.405144 | SFRS3     |
| 235530_at   | 100.33 | 218.57 | 0.459  | AI986112 | Hs.587290 | ---       |
| 235743_at   | 27.25  | 59.06  | 0.4614 | AA808178 | ---       | ---       |
| 236122_at   | 177.43 | 416.16 | 0.4264 | H40696   | Hs.658224 | ---       |
| 236146_at   | 60.85  | 140.08 | 0.4344 | BF593158 | Hs.571177 | SYNCRIP   |
| 236193_at   | 35.03  | 70.12  | 0.4996 | AA037483 | Hs.658713 | HIST1H2BC |
| 236196_at   | 199.16 | 428.1  | 0.4652 | BF939032 | Hs.586567 | ---       |
| 236219_at   | 158.87 | 403.85 | 0.3934 | AI452512 | Hs.667007 | ---       |
| 236600_at   | 160.43 | 535.19 | 0.2998 | AI651603 | Hs.440414 | SPG20     |
| 236655_at   | 176.02 | 417.22 | 0.4219 | AI632972 | Hs.368433 | TPD52     |
| 236922_at   | 79.76  | 163.23 | 0.4886 | AA772352 | Hs.126889 | ---       |
| 237999_at   | 11.56  | 25.91  | 0.4462 | AW195867 | ---       | ---       |
| 238078_at   | 96.97  | 216.21 | 0.4485 | N71074   | Hs.477361 | SEC22A    |
| 238421_at   | 33.08  | 98.5   | 0.3358 | N86386   | Hs.533499 | RC3H2     |
| 238448_at   | 98.08  | 216.02 | 0.454  | BE544070 | Hs.44024  | MRPL19    |
| 238472_at   | 104.57 | 214.93 | 0.4865 | R73399   | Hs.216653 | FBXO9     |
| 238552_at   | 13.2   | 34.79  | 0.3794 | BF028392 | Hs.659065 | ---       |
| 238584_at   | 73.3   | 150.78 | 0.4861 | W52934   | Hs.591594 | IQCA1     |
| 238704_at   | 106.14 | 222.19 | 0.4777 | BF245243 | Hs.464402 | ---       |
| 238723_at   | 53.28  | 125.84 | 0.4234 | AW083849 | Hs.532632 | ATXN3     |
| 239038_at   | 118.23 | 242.94 | 0.4867 | AW015063 | Hs.26226  | C1orf52   |
| 239148_at   | 119.12 | 238.68 | 0.4991 | AI493046 | Hs.513706 | MARVELD3  |
| 239184_at   | 25.53  | 51.56  | 0.4952 | AI122555 | Hs.417262 | ---       |
| 239301_at   | 8.95   | 18.61  | 0.4809 | BE551451 | Hs.631970 | ---       |
| 239423_at   | 46.31  | 103.45 | 0.4477 | AW043836 | ---       | ---       |
| 239533_at   | 7.04   | 14.09  | 0.4996 | AI970061 | Hs.516604 | GPR155    |
| 239552_at   | 54.15  | 115.74 | 0.4679 | BF059479 | Hs.669526 | VWDE      |
| 239688_at   | 30.57  | 87.81  | 0.3481 | AI733356 | Hs.211602 | SMC1A     |
| 240603_s_at | 25.71  | 63.71  | 0.4035 | AI688141 | Hs.248437 | ERI2      |
| 240627_x_at | 37.07  | 85.78  | 0.4322 | R38676   | Hs.594546 | ---       |
| 241017_at   | 165.04 | 356.9  | 0.4624 | AA779927 | Hs.442657 | TBC1D8    |
| 241372_at   | 91.71  | 198.54 | 0.4619 | R34135   | Hs.190477 | ZC3H6     |
| 241541_at   | 148.59 | 300.74 | 0.4941 | AW511227 | Hs.135805 | MIB2      |
| 242258_at   | 25.92  | 52.27  | 0.4959 | AW168154 | Hs.673171 | ---       |
| 242443_at   | 29.67  | 60.33  | 0.4918 | AW026978 | Hs.712606 | EML5      |

|              |        |        |        |           |           |          |
|--------------|--------|--------|--------|-----------|-----------|----------|
| 242447_at    | 115.71 | 323.77 | 0.3574 | AI656180  | Hs.380048 | C3orf70  |
| 242607_at    | 87.72  | 185.21 | 0.4736 | AW975512  | Hs.657682 | ---      |
| 242627_at    | 44.13  | 101.51 | 0.4347 | BE780360  | Hs.682433 | ---      |
| 243042_at    | 132.46 | 315.87 | 0.4193 | BE645144  | Hs.632419 | FAM73A   |
| 243880_at    | 53.63  | 136.13 | 0.394  | AW205003  | Hs.463278 | GOSR2    |
| 244107_at    | 114.67 | 266.14 | 0.4309 | AW189097  | ---       | ---      |
| 244688_at    | 40.86  | 119.65 | 0.3415 | AI743120  | Hs.633144 | ---      |
| 1552278_a_at | 187.51 | 405.37 | 0.4626 | NM_080669 | Hs.446689 | SLC46A1  |
| 1552740_at   | 35.86  | 72.36  | 0.4956 | NM_144706 | Hs.352211 | C2orf15  |
| 1552789_at   | 85.62  | 212.52 | 0.4029 | NM_153039 | Hs.622596 | SEC62    |
| 1552897_a_at | 114.51 | 229.87 | 0.4982 | NM_133329 | Hs.352633 | KCNG3    |
| 1555560_at   | 17     | 34.73  | 0.4895 | BC032302  | Hs.193226 | UGCGL2   |
| 1556062_at   | 42.29  | 90.61  | 0.4667 | AW182934  | Hs.139120 | RPP30    |
| 1556488_s_at | 19.17  | 42.36  | 0.4525 | AF497717  | Hs.341906 | C3orf15  |
| 1557403_s_at | 18.93  | 38.57  | 0.4908 | AW104813  | Hs.672731 | ---      |
| 1557593_at   | 28.83  | 71.05  | 0.4058 | AA250798  | Hs.528821 | SPAG17   |
| 1560133_at   | 26.27  | 57.2   | 0.4593 | BC012484  | Hs.565319 | GIGYF2   |
| 1560775_at   | 37.96  | 85.2   | 0.4455 | AV703843  | Hs.679549 | ---      |
| 1565743_at   | 28.86  | 73.73  | 0.3914 | BG545582  | Hs.661504 | ---      |
| 1566257_at   | 104.18 | 208.79 | 0.499  | AL049452  | Hs.439363 | ---      |
| 1566959_at   | 15.04  | 36.35  | 0.4138 | AL049273  | Hs.684587 | ---      |
| 1570552_at   | 63.54  | 145.4  | 0.437  | AF363068  | ---       | C18orf50 |

Supplementary Table S3: Target Sequences of siRNA Used in This Study

| Gene              | siRNA                             | Sequence                                          |
|-------------------|-----------------------------------|---------------------------------------------------|
| TDP-43 #1         | Sense: 5'→3'<br>Antisense: 5'→3'  | GCUUUGGCUCAAGCAUGGAUUt<br>AAUCCAUGCUUGAGCCAAAGCtt |
| TDP-43 #2 (3'UTR) | Sense: 5'→3'<br>Antisense: 5'→3'  | GGUGGUGCAUAAUGGAUAUt<br>AUAUCCAUAUAGCACCACtt      |
| FMRP #1           | Sense: 5'→3'<br>Antisense: 5'→3'  | CAGAAGACUUACGGCAAUUt<br>AUUUGCCGUAAGUCUUCUGtt     |
| FMRP #2           | Sense : 5'→3'<br>Antisense: 5'→3' | GCACUAAGUUGUCUCUGAUUt<br>AUCAGAGACAACUUAUGUCtt    |
| STAU1 # 1         | Sense: 5'→3'<br>Antisense: 5'→3'  | AGGGAUUC CAGGUUGAAUAt<br>UAUUCAACCUGGAAUCCUtt     |
| STAU1 #2          | Sense: 5'→3'<br>Antisense:5'→3'   | CUGCAGUUGAACGAGUAAAt<br>UUUACUCGUUCAACUGCAGtt     |

Supplementary Table S4: RT-qPCR Primers Used in This Study

| Gene | Strand | Sequence |
|------|--------|----------|
|------|--------|----------|

|        |         |                          |
|--------|---------|--------------------------|
| TUFT1  | Forward | GAGGCAGAGAATTTAGAGATGC   |
| TUFT1  | Reverse | TCAAAGGCAGTGTTAACAGC     |
| PTH    | Forward | TCTGCAGTCCAATTCATCAG     |
| PTH    | Reverse | CACTCACAGATCTCTTCTTAACAG |
| CASP7  | Forward | CCAATAAAGGATTTGACAGCCC   |
| CASP7  | Reverse | AGTAATAGCCTGGAACCGTG     |
| NMNAT2 | Forward | CACCTTTGTAGATGAGAATGCC   |
| NMNAT2 | Reverse | GTATTTGCGGAGTATTGAGGA    |
| SULF1  | Forward | CCTTATCAGCTCACAAATACAG   |
| SULF1  | Reverse | GATTAACCTTCCCATCCATCC    |
| CCNA1  | Forward | AACCTGGCTAAGTACGTAGC     |
| CCNA1  | Reverse | TACGCTTTATGAAGCTCACTC    |
| KPNA4  | Forward | CAGATGATATTGATGAAGACCC   |
| KPNA4  | Reverse | CTTTCCCGATTTAATGCAGC     |
| TDP-43 | Forward | GCTTCGCTACAGGAATCCAG     |
| TDP-43 | Reverse | GATCTTTCTTGACCTGCACC     |
| AQP3   | Forward | GTTTCCTCACCATCAACCTG     |
| AQP3   | Reverse | CCAGATTGCATCATAATACAGC   |
| SIRT1  | Forward | GTATTTATGCTCGCCTTGCT     |
| SIRT1  | Reverse | TTGCAAAGGAACCATGACAC     |
| BCCIP  | Forward | ACGGATGTTTCAGAAGACAG     |
| BCCIP  | Reverse | GCCAGTTCTTTCTGAAGCTG     |
| ERI2   | Forward | GAGAACATTCTGGGTTGGAC     |
| ERI2   | Reverse | CAAATTTCTGGCCAGAATGCT    |
| CYR61  | Forward | CCTTAGTCGTCACCCTTCTC     |
| CYR61  | Reverse | CTCTGACTGAGCTCTGCA       |
| ZEB2   | Forward | GCCTACACCTACCCAACTG      |
| ZEB2   | Reverse | CAAGCAATTCTCCCTGAAATCC   |
| IGFBP6 | Forward | TGAGGGCTGTCTCAGGA        |
| IGFBP6 | Reverse | TCCTCTGCAACAGCAGG        |
| TPM4   | Forward | AACTGAAAGAGGCTGAGACC     |
| TPM4   | Reverse | CTTACAAGAGAAGAGAAAGACCC  |
| PCDH10 | Forward | CCAACGAGACTAAACACCAG     |
| PCDH10 | Reverse | TCCCTGTTCACTGTCTCC       |
| CNRIP1 | Forward | GCAGGTGAGAAATATTCCA      |
| CNRIP1 | Reverse | GAACTTGACTTGCCACACTG     |
| KCNG3  | Forward | TAGCGTGTCCGGTGGT         |
| KCNG3  | Reverse | TCAATTATCCCGGAGGGC       |
| TBC1D9 | Forward | CGAGGAGAGTGAGAAAGAG      |
| TBC1D9 | Reverse | ACCGCATCTGAGAAGAG        |

|        |         |                           |
|--------|---------|---------------------------|
| SMC1A  | Forward | GTGATTGATGTGATTTCGCTATGAG |
| SMC1A  | Reverse | CATCTGCTCTTTCAGCTCC       |
| MRPL19 | Forward | GGAACGCAGGTTCTTGAG        |
| MRPL19 | Reverse | TCCTTCGATAACATTCCTAAGG    |
| FMRP   | Forward | GGAGGCTTCAAAGGAAACGAC     |
| FMRP   | Reverse | CTGTCTGGCTTCTCTTTCTTCTG   |
| STAU-1 | Forward | TCAATCCGATTAGCCGACTG      |
| STAU-1 | Reverse | TCTTTATGGGTGTCTTCTCCTCTG  |
| GAPDH  | Forward | AAGGTGAAGGTCGGAGTCAAC     |
| GAPDH  | Reverse | GGGGTCATTGATGGCAACAATA    |

Supplementary Table S5: RIP Primers Used in This Study

| Gene     | Strand  | Sequence                            |
|----------|---------|-------------------------------------|
| SIRT1-#1 | Forward | TGGAATACCTGACTTCAGGT                |
| SIRT1-#1 | Reverse | GCAAAGGAACCATGACACTG                |
| SIRT1-#2 | Forward | CAGTGTCATGGTTCCTTTGC                |
| SIRT1-#2 | Reverse | GGTCTTACTTTGAGGGAAGAC               |
| SIRT1-#3 | Forward | CAGTGTCATGGTTCCTTTGC                |
| SIRT1-#3 | Reverse | GTTTCATGATAGCAAGCGGT                |
| SIRT1-#4 | Forward | CAGTGTCATGGTTCCTTTGC                |
| SIRT1-#4 | Reverse | TCTTACTTTGAGGGAAGACCC               |
| SIRT1-#5 | Forward | AATTGTTCCACCAGCATTAGGAA             |
| SIRT1-#5 | Reverse | CCTTGCTCTATCGAGTTCACAAGTAA          |
| SIRT1-#6 | Forward | CACTGTGGTAGAGCTTGCATTGA             |
| SIRT1-#6 | Reverse | GGCTTTGCATATTCACATTTTGG             |
| SIRT1-#7 | Forward | GAGCAACAGGCCCTGATT                  |
| SIRT1-#7 | Reverse | AGACATGTACTTTCTGGCTGAATTACA         |
| HDAC6    | Forward | ACGGTCCCTCTTCACGGTCCCTCTTCACCTTCT   |
| HDAC6    | Reverse | CTTCTGGGCTGGAGTCTTCTGGGCTGGAGTAGTGG |
| GAPDH    | Forward | AAGGTGAAGGTCGGAGTCAAC               |
| GAPDH    | Reverse | GGGGTCATTGATGGCAACAATA              |
